# Supplementary material
Source: HighWire-hosted journal article supplement (https://erj.ersjournals.com/content/50/5/1700578)
Supplement: inline-supplementary-material-13 [file inline-supplementary-material-13.pdf]

### **1. Task Force's details**

*Full title: Assessment of pulmonary exercise hemodynamics*

*Chairs' name: Prof. Horst Olschewski, Prof. Philippe Herve*

*Number (for approved TF)*

### **2. Personal Information:**

*Title and name and surname:*

*Short statement of my expertise in the topic of the Task Force:*

**Dr. Gabor Kovacs**

**I work in the research group of H. Olschewski and am the first author of recent scientific papers on exercise hemodynamics in healthy subjects and in patients at risk for PH. In addition I recently published on the clinical relevance of borderline pulmonary hemodynamics. I have large personal experience in the performance of exercise catheterizations and echocardiographies.**

### **3. General Disclosure of Conflicts of Interests**

I understand that the intent of this disclosure is not to prevent a Task Force member or chair with a significant financial or other relationship from participating in Task Force, but rather to provide other members with information on which they can make their own judgments. It remains for the other Task Force member and chairs to determine whether my interests or relationships may influence my participation in the project. The ERS does not view the existence of these interests or commitments as necessarily implying bias or decreasing the value of the Task Force member/chair's participation.

☒ **Yes**, I have the following, real or perceived conflicts of interest that relate to this Task Force. I understand that I have to disclose them to the other Task Force members during the first meeting or teleconference.

G. Kovacs has links with pharmaceutical companies developing drugs in the field of pulmonary hypertension, including Actelion, Bayer, GSK, Pfizer. These links include congress supports and speaker's honoraria.

☐ **No**, I have no, real or perceived, conflicts of interest that relate to this Task Force.

### **4. Tobacco Industry-related Conflicts of Interests**

ERS does not accept faculty who are receiving funding from the tobacco industry.

In the case of **disclosure** of a conflict of interest any time after **1/1/2000** by the person concerned, there is a **5-year ban** from the date of disclosure before that person is allowed to participate actively in an ERS activity.

Where a **conflict of interest is discovered and not disclosed**, there is a **ban for life** from participating in any ERS activity. The same ban applies to any undisclosed other real or

perceived, direct or indirect links with the tobacco industry, such as the holding of shares, speaking at or attending meetings organised by the tobacco industry.

Where any person is found to be **maintaining a relationship** with, or **receiving funding from**, the tobacco industry after **1/1/2013** there will be a ban for life from involvement in any ERS activity.

Please select what applies to you:

☒ I declare that I have had **NO** relationship of any kind with the tobacco industry (since 1/1/2000), nor will have a link to the tobacco industry before the event to which I have been invited by the ERS to participate in.

☐ **Yes**, I declare that I have or have had a relationship with the tobacco industry after 1/1/2000 and before 1/1/2013. *NOTE: ERS will have to cancel this invitation and you will be banned from all ERS activity for 5 years.*

☐ **Yes**, I declare that I have or will have a relationship with the tobacco industry after 1/1/2013.

*NOTE: The ERS no longer accepts Faculty who has links with the tobacco industry, the ERS will have to cancel this invitation and you will be banned for life from all ERS activity.*

  
Signature: Dr. Gabor Kovacs

Date: 30-09-2014

---

### **1. Task Force's details**

*Full title: Assessment of pulmonary exercise hemodynamics*

*Chairs' name: Dr HERVE and Dr OLSCHESKI*

*Number (for approved TF)*

### **2. Personal Information:**

*Title and name and surname: Dr. Philippe Herve*

*Short statement of my expertise in the topic of the Task Force:*

|                                                                                          |
|------------------------------------------------------------------------------------------|
| <b>Expert in Catheterization during exercise in patients with pulmonary hypertension</b> |
|------------------------------------------------------------------------------------------|

### **3. General Disclosure of Conflicts of Interests**

I understand that the intent of this disclosure is not to prevent a Task Force member or chair with a significant financial or other relationship from participating in Task Force, but rather to provide other members with information on which they can make their own judgments. It remains for the other Task Force member and chairs to determine whether my interests or relationships may influence my participation in the project. The ERS does not view the existence of these interests or commitments as necessarily implying bias or decreasing the value of the Task Force member/chair's participation.

☐ **Yes**, I have the following, real or perceived conflicts of interest that relate to this Task Force. I understand that I have to disclose them to the other Task Force members during the first meeting or teleconference.

☒ **No**, I have no, real or perceived, conflicts of interest that relate to this Task Force.

### **4. Tobacco Industry-related Conflicts of Interests**

ERS does not accept faculty who are receiving funding from the tobacco industry.

In the case of **disclosure** of a conflict of interest any time after **1/1/2000** by the person concerned, there is a **5-year ban** from the date of disclosure before that person is allowed to participate actively in an ERS activity.

Where a **conflict of interest is discovered and not disclosed**, there is a **ban for life** from participating in any ERS activity. The same ban applies to any undisclosed other real or perceived, direct or indirect links with the tobacco industry, such as the holding of shares, speaking at or attending meetings organised by the tobacco industry.

Where any person is found to be **maintaining a relationship** with, or **receiving funding from**, the tobacco industry after **1/1/2013** there will be a ban for life from involvement in any ERS activity.

Please select what applies to you:

☒ I declare that I have had **NO** relationship of any kind with the tobacco industry (since 1/1/2000), nor will have a link to the tobacco industry before the event to which I have been invited by the ERS to participate in.

☐ **Yes**, I declare that I have or have had a relationship with the tobacco industry after 1/1/2000 and before 1/1/2013. *NOTE: ERS will have to cancel this invitation and you will be banned from all ERS activity for 5 years.*

☐ **Yes**, I declare that I have or will have a relationship with the tobacco industry after 1/1/2013.

*NOTE: The ERS no longer accepts Faculty who has links with the tobacco industry, the ERS will have to cancel this invitation and you will be banned for life from all ERS activity.*

Signature: Philippe HERVE

A handwritten signature in black ink, appearing to be 'PH' with a large loop and a horizontal stroke extending to the right.

Date: 17 september 2014



### **1. Task Force's details**

*Full title: Assessment of pulmonary exercise hemodynamics*

*Chairs' name: H. Olschewski and P. Hervé*

*Number (for approved TF)*

### **2. Personal Information:**

*Title and name and surname:*

*Short statement of my expertise in the topic of the Task Force:*

**Joan Albert Barberà, MD, PhD**

**I have been working in the field of exercise physiology, in particular those aspects related to the vascular regulation for more than 20 years. My research interest has been focused on ventilation-perfusion relationships and the effects of therapeutic interventions. Results of the studies have been published in Am J Respir Crit Care Med, Eur Respir J, J Appl Physiol, Chest and Am J Physiol, among others.**

### **3. General Disclosure of Conflicts of Interests**

I understand that the intent of this disclosure is not to prevent a Task Force member or chair with a significant financial or other relationship from participating in Task Force, but rather to provide other members with information on which they can make their own judgments. It remains for the other Task Force member and chairs to determine whether my interests or relationships may influence my participation in the project. The ERS does not view the existence of these interests or commitments as necessarily implying bias or decreasing the value of the Task Force member/chair's participation.

☐ **Yes**, I have the following, real or perceived conflicts of interest that relate to this Task Force. I understand that I have to disclose them to the other Task Force members during the first meeting or teleconference.

☒ **No**, I have no, real or perceived, conflicts of interest that relate to this Task Force.

### **4. Tobacco Industry-related Conflicts of Interests**

ERS does not accept faculty who are receiving funding from the tobacco industry.

In the case of **disclosure** of a conflict of interest any time after **1/1/2000** by the person concerned, there is a **5-year ban** from the date of disclosure before that person is allowed to participate actively in an ERS activity.

Where a **conflict of interest is discovered and not disclosed**, there is a **ban for life** from participating in any ERS activity. The same ban applies to any undisclosed other real or perceived, direct or indirect links with the tobacco industry, such as the holding of shares, speaking at or attending meetings organised by the tobacco industry.

Where any person is found to be **maintaining a relationship** with, or **receiving funding from**, the tobacco industry after **1/1/2013** there will be a ban for life from involvement in any ERS activity.

Please select what applies to you:

☒ I declare that I have had **NO** relationship of any kind with the tobacco industry (since 1/1/2000), nor will have a link to the tobacco industry before the event to which I have been invited by the ERS to participate in.

☐ **Yes**, I declare that I have or have had a relationship with the tobacco industry after 1/1/2000 and before 1/1/2013. *NOTE: ERS will have to cancel this invitation and you will be banned from all ERS activity for 5 years.*

☐ **Yes**, I declare that I have or will have a relationship with the tobacco industry after 1/1/2013.

*NOTE: The ERS no longer accepts Faculty who has links with the tobacco industry, the ERS will have to cancel this invitation and you will be banned for life from all ERS activity.*



Signature: Joan Albert Barberà

Date: September 29<sup>th</sup>, 2014

## **2. Personal Information:**

*Title and name and surname:*

*Short statement of my expertise in the topic of the Task Force:*

**I have worked and published few papers on pulmonary hypertension in patients with COPD and on exercise measures in PAH.**

## **3. General Disclosure of Conflicts of Interests**

I understand that the intent of this disclosure is not to prevent a Task Force member or chair with a significant financial or other relationship from participating in Task Force, but rather to provide other members with information on which they can make their own judgments. It remains for the other Task Force member and chairs to determine whether my interests or relationships may influence my participation in the project. The ERS does not view the existence of these interests or commitments as necessarily implying bias or decreasing the value of the Task Force member/chair's participation.

☒ **Yes**, I have the following, real or perceived conflicts of interest that relate to this Task Force. I understand that I have to disclose them to the other Task Force members during the first meeting or teleconference.

Actelion: personal fees and non-financial support; Bayer: personal fees and non-financial support; Bioprojet Pharma: non-financial support; Boehringer-Ingelheim: personal fees and non-financial support; Chiesi: personal fees; GSK: non-financial support; MSD: personal fees; Novartis: personal fees and non-financial support.

☐ **No**, I have no, real or perceived, conflicts of interest that relate to this Task Force.

## **4. Tobacco Industry-related Conflicts of Interests**

ERS does not accept faculty who are receiving funding from the tobacco industry.

In the case of **disclosure** of a conflict of interest any time after **1/1/2000** by the person concerned, there is a **5-year ban** from the date of disclosure before that person is allowed to participate actively in an ERS activity.

Where a **conflict of interest is discovered and not disclosed**, there is a **ban for life** from participating in any ERS activity. The same ban applies to any undisclosed other real or perceived, direct or indirect links with the tobacco industry, such as the holding of shares, speaking at or attending meetings organised by the tobacco industry.

Where any person is found to be **maintaining a relationship** with, or **receiving funding from**, the tobacco industry after **1/1/2013** there will be a ban for life from involvement in any ERS activity.

Please select what applies to you:

☒ I declare that I have had **NO** relationship of any kind with the tobacco industry (since 1/1/2000), nor will have a link to the tobacco industry before the event to which I have been invited by the ERS to participate in.

☐ **Yes**, I declare that I have or have had a relationship with the tobacco industry after 1/1/2000 and before 1/1/2013. *NOTE: ERS will have to cancel this invitation and you will be banned from all ERS activity for 5 years.*

☐ **Yes**, I declare that I have or will have a relationship with the tobacco industry after 1/1/2013.

*NOTE: The ERS no longer accepts Faculty who has links with the tobacco industry, the ERS will have to cancel this invitation and you will be banned for life from all ERS activity.*

Signature: Ari Chaouat

Date: 13<sup>th</sup> March, 2017

---



### **1. Task Force's details**

*Full title: Assessment of pulmonary exercise hemodynamics*

*Chairs' name: H. Olschewski and P. Hervé*

*Number (for approved TF)*

### **2. Personal Information:**

*Title and name and surname:*

*Short statement of my expertise in the topic of the Task Force:*

**Prof. CHEMLA Denis, MD. Professor of Physiology.**

**Fields of expertise: cardiac and pulmonary vascular parameters in PH, exercise hemodynamics (high-fidelity catheters and fluid-filled catheters).**

### **3. General Disclosure of Conflicts of Interests**

I understand that the intent of this disclosure is not to prevent a Task Force member or chair with a significant financial or other relationship from participating in Task Force, but rather to provide other members with information on which they can make their own judgments. It remains for the other Task Force member and chairs to determine whether my interests or relationships may influence my participation in the project. The ERS does not view the existence of these interests or commitments as necessarily implying bias or decreasing the value of the Task Force member/chair's participation.

☒ **Yes**, I have the following, real or perceived conflicts of interest that relate to this Task Force. I understand that I have to disclose them to the other Task Force members during the first meeting or teleconference.

I have received a travel grant (Bayer) for travelling and attending the ATS meeting 2014

☐ **No**, I have no, real or perceived, conflicts of interest that relate to this Task Force.

### **4. Tobacco Industry-related Conflicts of Interests**

ERS does not accept faculty who are receiving funding from the tobacco industry.

In the case of **disclosure** of a conflict of interest any time after **1/1/2000** by the person concerned, there is a **5-year ban** from the date of disclosure before that person is allowed to participate actively in an ERS activity.

Where a **conflict of interest is discovered and not disclosed**, there is a **ban for life** from participating in any ERS activity. The same ban applies to any undisclosed other real or perceived, direct or indirect links with the tobacco industry, such as the holding of shares, speaking at or attending meetings organised by the tobacco industry.

Where any person is found to be **maintaining a relationship** with, or **receiving funding from**, the tobacco industry after **1/1/2013** there will be a ban for life from involvement in any ERS activity.

Please select what applies to you:

☒ I declare that I have had **NO** relationship of any kind with the tobacco industry (since 1/1/2000), nor will have a link to the tobacco industry before the event to which I have been invited by the ERS to participate in.

☐ **Yes**, I declare that I have or have had a relationship with the tobacco industry after 1/1/2000 and before 1/1/2013. *NOTE: ERS will have to cancel this invitation and you will be banned from all ERS activity for 5 years.*

☐ **Yes**, I declare that I have or will have a relationship with the tobacco industry after 1/1/2013.

*NOTE: The ERS no longer accepts Faculty who has links with the tobacco industry, the ERS will have to cancel this invitation and you will be banned for life from all ERS activity.*

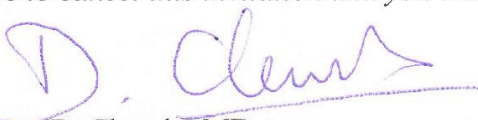  
Signature: D. Chemla, MD

Date: September 18, 2014

---



### **1. Task Force's details**

*Full title: Assessment of pulmonary exercise hemodynamics*

*Chairs' name: Prof H Olschewski & Dr P Herve*

*Number (for approved TF)*

### **2. Personal Information:**

*Title and name and surname:*

*Short statement of my expertise in the topic of the Task Force:*

**I am a consultant respiratory physician in the Sheffield Pulmonary vascular Disease Unit, one of the largest pulmonary hypertension centres in Europe. I have published widely on a range of aspects of pulmonary hypertension including the long term outcome in patients with exercise induced pulmonary hypertension and systemic sclerosis. I was a member of the task force on assessment and diagnosis of PH at the 5<sup>th</sup> World PH symposium.**

### **3. General Disclosure of Conflicts of Interests**

I understand that the intent of this disclosure is not to prevent a Task Force member or chair with a significant financial or other relationship from participating in Task Force, but rather to provide other members with information on which they can make their own judgments. It remains for the other Task Force member and chairs to determine whether my interests or relationships may influence my participation in the project. The ERS does not view the existence of these interests or commitments as necessarily implying bias or decreasing the value of the Task Force member/chair's participation.

☒ **Yes**, I have the following, real or perceived conflicts of interest that relate to this Task Force. I understand that I have to disclose them to the other Task Force members during the first meeting or teleconference.

Honoraria for lecturing, advisory boards and conference travel from Actelion, GSK, United Therapeutics, Bayer and Pfizer pharmaceuticals.

☐ **No**, I have no, real or perceived, conflicts of interest that relate to this Task Force.

### **4. Tobacco Industry-related Conflicts of Interests**

ERS does not accept faculty who are receiving funding from the tobacco industry.

In the case of **disclosure** of a conflict of interest any time after **1/1/2000** by the person concerned, there is a **5-year ban** from the date of disclosure before that person is allowed to participate actively in an ERS activity.

Where a **conflict of interest is discovered and not disclosed**, there is a **ban for life** from participating in any ERS activity. The same ban applies to any undisclosed other real or perceived, direct or indirect links with the tobacco industry, such as the holding of shares, speaking at or attending meetings organised by the tobacco industry.

Where any person is found to be **maintaining a relationship** with, or **receiving funding from**, the tobacco industry after **1/1/2013** there will be a ban for life from involvement in any ERS activity.

Please select what applies to you:

☒ I declare that I have had **NO** relationship of any kind with the tobacco industry (since 1/1/2000), nor will have a link to the tobacco industry before the event to which I have been invited by the ERS to participate in.

☐ **Yes**, I declare that I have or have had a relationship with the tobacco industry after 1/1/2000 and before 1/1/2013. *NOTE: ERS will have to cancel this invitation and you will be banned from all ERS activity for 5 years.*

☐ **Yes**, I declare that I have or will have a relationship with the tobacco industry after 1/1/2013.

*NOTE: The ERS no longer accepts Faculty who has links with the tobacco industry, the ERS will have to cancel this invitation and you will be banned for life from all ERS activity.*

Signature: 

Date: 26/09/14

---

### **1. Task Force's details**

*Full title: Assessment of pulmonary exercise hemodynamics*

*Chairs' name: Olschewski Horst/Hervé Philippe*

*Number (for approved TF)*

### **2. Personal Information:**

*Title and name and surname: Dr. Gilles Garcia*

*Short statement of my expertise in the topic of the Task Force:*

**Pulmonologist, Associate Professor in Clinical Physiology, expert in exercise physiology and pulmonary gas exchange in pulmonary arterial hypertension and cardiopulmonary diseases.**

### **3. General Disclosure of Conflicts of Interests**

I understand that the intent of this disclosure is not to prevent a Task Force member or chair with a significant financial or other relationship from participating in Task Force, but rather to provide other members with information on which they can make their own judgments. It remains for the other Task Force member and chairs to determine whether my interests or relationships may influence my participation in the project. The ERS does not view the existence of these interests or commitments as necessarily implying bias or decreasing the value of the Task Force member/chair's participation.

☐ **Yes**, I have the following, real or perceived conflicts of interest that relate to this Task Force. I understand that I have to disclose them to the other Task Force members during the first meeting or teleconference.

☒ **No**, I have no, real or perceived, conflicts of interest that relate to this Task Force.

### **4. Tobacco Industry-related Conflicts of Interests**

ERS does not accept faculty who are receiving funding from the tobacco industry.

In the case of **disclosure** of a conflict of interest any time after **1/1/2000** by the person concerned, there is a **5-year ban** from the date of disclosure before that person is allowed to participate actively in an ERS activity.

Where a **conflict of interest is discovered and not disclosed**, there is a **ban for life** from participating in any ERS activity. The same ban applies to any undisclosed other real or perceived, direct or indirect links with the tobacco industry, such as the holding of shares, speaking at or attending meetings organised by the tobacco industry.

Where any person is found to be **maintaining a relationship** with, or **receiving funding from**, the tobacco industry after **1/1/2013** there will be a ban for life from involvement in any ERS activity.

Please select what applies to you:

☒ I declare that I have had **NO** relationship of any kind with the tobacco industry (since 1/1/2000), nor will have a link to the tobacco industry before the event to which I have been invited by the ERS to participate in.

☐ **Yes**, I declare that I have or have had a relationship with the tobacco industry after 1/1/2000 and before 1/1/2013. *NOTE: ERS will have to cancel this invitation and you will be banned from all ERS activity for 5 years.*

☐ **Yes**, I declare that I have or will have a relationship with the tobacco industry after 1/1/2013.

*NOTE: The ERS no longer accepts Faculty who has links with the tobacco industry, the ERS will have to cancel this invitation and you will be banned for life from all ERS activity.*

Signature:

A handwritten signature in black ink, consisting of a stylized 'H' followed by a horizontal line and a small flourish.

Date: 29/09/2014

### **1. Task Force's details**

*Full title: Assessment of pulmonary exercise hemodynamics*

*Chairs' name: Horst Olschewski, Philippe Hervé*

*Number (for approved TF)*

### **2. Personal Information:**

*Title and name and surname:*

*Short statement of my expertise in the topic of the Task Force:*

**Prof. Dr. med. Ekkehard Grünig**

**Assessment of Pulmonary Exercise Hemodynamics by Echocardiography**

**Profound knowledge and scientific work about exercise hemodynamics, measurement of pulmonary arterial pressure during exercise in pulmonary hypertension and healthy subjects. Scientific work about screening with stress-doppler-echocardiography for at-risk groups for pulmonary hypertension, e.g. the 5<sup>th</sup> European framework "Disposition to PPH".**

### **3. General Disclosure of Conflicts of Interests**

I understand that the intent of this disclosure is not to prevent a Task Force member or chair with a significant financial or other relationship from participating in Task Force, but rather to provide other members with information on which they can make their own judgments. It remains for the other Task Force member and chairs to determine whether my interests or relationships may influence my participation in the project. The ERS does not view the existence of these interests or commitments as necessarily implying bias or decreasing the value of the Task Force member/chair's participation.

☐ **Yes**, I have the following, real or perceived conflicts of interest that relate to this Task Force. I understand that I have to disclose them to the other Task Force members during the first meeting or teleconference.

☒ **No**, I have no, real or perceived, conflicts of interest that relate to this Task Force.

### **4. Tobacco Industry-related Conflicts of Interests**

ERS does not accept faculty who are receiving funding from the tobacco industry.

In the case of **disclosure** of a conflict of interest any time after 1/1/2000 by the person concerned, there is a **5-year ban** from the date of disclosure before that person is allowed to participate actively in an ERS activity.

Where a **conflict of interest is discovered and not disclosed**, there is a **ban for life** from participating in any ERS activity. The same ban applies to any undisclosed other real or

perceived, direct or indirect links with the tobacco industry, such as the holding of shares, speaking at or attending meetings organised by the tobacco industry.

Where any person is found to be **maintaining a relationship** with, or **receiving funding from**, the tobacco industry after **1/1/2013** there will be a ban for life from involvement in any ERS activity.

Please select what applies to you:

☒ I declare that I have had **NO** relationship of any kind with the tobacco industry (since 1/1/2000), nor will have a link to the tobacco industry before the event to which I have been invited by the ERS to participate in.

☐ **Yes**, I declare that I have or have had a relationship with the tobacco industry after 1/1/2000 and before 1/1/2013. *NOTE: ERS will have to cancel this invitation and you will be banned from all ERS activity for 5 years.*

☐ **Yes**, I declare that I have or will have a relationship with the tobacco industry after 1/1/2013.

*NOTE: The ERS no longer accepts Faculty who has links with the tobacco industry, the ERS will have to cancel this invitation and you will be banned for life from all ERS activity.*

Signature:

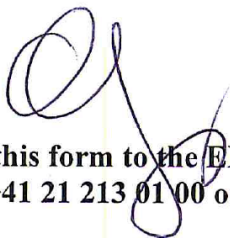

Date: 26.Sep 2014

**Please return this form to the ERS Headquarters, duly completed and signed by fax to +41 21 213 01 00 or by email to [valerie.rebeaud@ersnet.org](mailto:valerie.rebeaud@ersnet.org)**

---



### **1. Task Force's details**

*Full title: Assessment of pulmonary exercise hemodynamics*

*Chairs' name: H. Olschewski & P. Herve*

*Number (for approved TF)*

### **2. Personal Information:**

*Title and name and surname:*

*Short statement of my expertise in the topic of the Task Force:*

**Dr Luke Howard**

**I oversee the cardiopulmonary exercise laboratory at Hammersmith Hospital and have established hemodynamic exercise testing at our institution, integrating the clinical it in to our research programme, with our current multicentre trials using this as a secondary endpoint. I have published in the field of cardiopulmonary exercise testing and have a special interest in linking exercise physiology to phenotype.**

### **3. General Disclosure of Conflicts of Interests**

I understand that the intent of this disclosure is not to prevent a Task Force member or chair with a significant financial or other relationship from participating in Task Force, but rather to provide other members with information on which they can make their own judgments. It remains for the other Task Force member and chairs to determine whether my interests or relationships may influence my participation in the project. The ERS does not view the existence of these interests or commitments as necessarily implying bias or decreasing the value of the Task Force member/chair's participation.

☐ **Yes**, I have the following, real or perceived conflicts of interest that relate to this Task Force. I understand that I have to disclose them to the other Task Force members during the first meeting or teleconference.

☒ **No**, I have no, real or perceived, conflicts of interest that relate to this Task Force.

### **4. Tobacco Industry-related Conflicts of Interests**

ERS does not accept faculty who are receiving funding from the tobacco industry.

In the case of **disclosure** of a conflict of interest any time after **1/1/2000** by the person concerned, there is a **5-year ban** from the date of disclosure before that person is allowed to participate actively in an ERS activity.

Where a **conflict of interest is discovered and not disclosed**, there is a **ban for life** from participating in any ERS activity. The same ban applies to any undisclosed other real or perceived, direct or indirect links with the tobacco industry, such as the holding of shares, speaking at or attending meetings organised by the tobacco industry.

Where any person is found to be **maintaining a relationship** with, or **receiving funding from**, the tobacco industry after **1/1/2013** there will be a ban for life from involvement in any ERS activity.

Please select what applies to you:

☒ I declare that I have had **NO** relationship of any kind with the tobacco industry (since 1/1/2000), nor will have a link to the tobacco industry before the event to which I have been invited by the ERS to participate in.

☐ **Yes**, I declare that I have or have had a relationship with the tobacco industry after 1/1/2000 and before 1/1/2013. *NOTE: ERS will have to cancel this invitation and you will be banned from all ERS activity for 5 years.*

☐ **Yes**, I declare that I have or will have a relationship with the tobacco industry after 1/1/2013.

*NOTE: The ERS no longer accepts Faculty who has links with the tobacco industry, the ERS will have to cancel this invitation and you will be banned for life from all ERS activity.*

Signature: Luke Howard

Date: 28 September 2014

### **1. Task Force's details**

*Full title: Assessment of pulmonary exercise hemodynamics*

*Chairs' name: Olschewski & Hervé*

*Number (for approved TF) NA*

### **2. Personal Information:**

*Title and name and surname:*

*Short statement of my expertise in the topic of the Task Force:*

**Marc Humbert, MD, PhD, Professor of Respiratory Medicine, Head of the Inserm Unit 999 (Pulmonary Hypertension: pathophysiology and innovative therapies), vice chairman of the French Refral Center for Pulmonary Hypertension. I have been involvement in pulmonary hypertension education, research and care since the late 1980s. I am currently chairing the ESC/ERS pulmonary hypertension guidelines.**

### **3. General Disclosure of Conflicts of Interests**

I understand that the intent of this disclosure is not to prevent a Task Force member or chair with a significant financial or other relationship from participating in Task Force, but rather to provide other members with information on which they can make their own judgments. It remains for the other Task Force member and chairs to determine whether my interests or relationships may influence my participation in the project. The ERS does not view the existence of these interests or commitments as necessarily implying bias or decreasing the value of the Task Force member/chair's participation.

☒ **Yes**, I have the following, real or perceived conflicts of interest that relate to this Task Force. I understand that I have to disclose them to the other Task Force members during the first meeting or teleconference.

M. Humbert has links with pharmaceutical companies developing drugs in the field of pulmonary hypertension, including Actelion, Bayer, GSK, Novartis, Pfizer. These links include consultancy service, speaker at conference and participation in randomized controlled trials.

☐ **No**, I have no, real or perceived, conflicts of interest that relate to this Task Force.

### **4. Tobacco Industry-related Conflicts of Interests**

ERS does not accept faculty who are receiving funding from the tobacco industry.

In the case of **disclosure** of a conflict of interest any time after **1/1/2000** by the person concerned, there is a **5-year ban** from the date of disclosure before that person is allowed to participate actively in an ERS activity.

Where a **conflict of interest is discovered and not disclosed**, there is a **ban for life** from participating in any ERS activity. The same ban applies to any undisclosed other real or

perceived, direct or indirect links with the tobacco industry, such as the holding of shares, speaking at or attending meetings organised by the tobacco industry.

Where any person is found to be **maintaining a relationship** with, or **receiving funding from**, the tobacco industry after **1/1/2013** there will be a ban for life from involvement in any ERS activity.

Please select what applies to you:

☒ I declare that I have had **NO** relationship of any kind with the tobacco industry (since 1/1/2000), nor will have a link to the tobacco industry before the event to which I have been invited by the ERS to participate in.

☐ **Yes**, I declare that I have or have had a relationship with the tobacco industry after 1/1/2000 and before 1/1/2013. *NOTE: ERS will have to cancel this invitation and you will be banned from all ERS activity for 5 years.*

☐ **Yes**, I declare that I have or will have a relationship with the tobacco industry after 1/1/2013.

*NOTE: The ERS no longer accepts Faculty who has links with the tobacco industry, the ERS will have to cancel this invitation and you will be banned for life from all ERS activity.*

Signature: M. HUMBERT

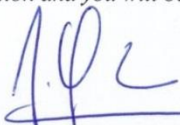

Date: 25/9/2014

**Please return this form to the ERS Headquarters, duly completed and signed by fax to +41 21 213 01 00 or by email to [valerie.rebeaud@ersnet.org](mailto:valerie.rebeaud@ersnet.org)**

**CENTRE HOSPITALIER UNIVERSITAIRE DE BICETRE**  
Service de Pneumologie - Soins Intensifs  
78, rue du Général Leclerc  
94275 LE KREMLIN BICETRE CEDEX  
Secrétariat : 01 45 21 79 72  
**Pr Marc HUMBERT**  
RPPS 10001053056



### **1. Task Force's details**

*Full title: Assessment of pulmonary exercise hemodynamics*

*Chairs' name: Horst Olschewski and Philippe Herve*

*Number (for approved TF)*

### **2. Personal Information:**

*Title and name and surname:*

*Short statement of my expertise in the topic of the Task Force:*

**Dr Edmund Lau**

**I am a pulmonologist with clinical and research interest in pulmonary vascular disease. I have published, as first author, on aspects of the pathophysiology of the pulmonary circulation including advanced invasive hemodynamic assessment, lung perfusion in pulmonary vascular disease, and non-invasive evaluation of the RV/pulmonary circulation with stress echocardiography. I currently work at the French National Referral Center with specific clinical interest in invasive exercise hemodynamics.**

### **3. General Disclosure of Conflicts of Interests**

I understand that the intent of this disclosure is not to prevent a Task Force member or chair with a significant financial or other relationship from participating in Task Force, but rather to provide other members with information on which they can make their own judgments. It remains for the other Task Force member and chairs to determine whether my interests or relationships may influence my participation in the project. The ERS does not view the existence of these interests or commitments as necessarily implying bias or decreasing the value of the Task Force member/chair's participation.

☒ **Yes**, I have the following, real or perceived conflicts of interest that relate to this Task Force. I understand that I have to disclose them to the other Task Force members during the first meeting or teleconference.

I have received honoraria for speaking engagements and travel support from Actelion Pharmaceuticals.

☐ **No**, I have no, real or perceived, conflicts of interest that relate to this Task Force.

### **4. Tobacco Industry-related Conflicts of Interests**

ERS does not accept faculty who are receiving funding from the tobacco industry.

In the case of **disclosure** of a conflict of interest any time after **1/1/2000** by the person concerned, there is a **5-year ban** from the date of disclosure before that person is allowed to participate actively in an ERS activity.

Where a **conflict of interest is discovered and not disclosed**, there is a **ban for life** from participating in any ERS activity. The same ban applies to any undisclosed other real or

perceived, direct or indirect links with the tobacco industry, such as the holding of shares, speaking at or attending meetings organised by the tobacco industry.

Where any person is found to be **maintaining a relationship** with, or **receiving funding from**, the tobacco industry after **1/1/2013** there will be a ban for life from involvement in any ERS activity.

Please select what applies to you:

☒ I declare that I have had **NO** relationship of any kind with the tobacco industry (since 1/1/2000), nor will have a link to the tobacco industry before the event to which I have been invited by the ERS to participate in.

☐ **Yes**, I declare that I have or have had a relationship with the tobacco industry after 1/1/2000 and before 1/1/2013. *NOTE: ERS will have to cancel this invitation and you will be banned from all ERS activity for 5 years.*

☐ **Yes**, I declare that I have or will have a relationship with the tobacco industry after 1/1/2013.

*NOTE: The ERS no longer accepts Faculty who has links with the tobacco industry, the ERS will have to cancel this invitation and you will be banned for life from all ERS activity.*

Signature:

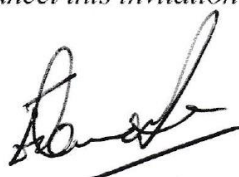

Date: 26/9/2014

---



### **1. Task Force's details**

*Full title: Assessment of pulmonary exercise hemodynamics*

*Chairs' name: Olschewski Horst/Hervé Philippe*

*Number (for approved TF)*

### **2. Personal Information:**

*Title and name and surname:*

*Short statement of my expertise in the topic of the Task Force:*

**Dr. Pierantonio Laveneziana, pulmonologist, PhD, Assistant Professor in Clinical Physiology, expert in cardiopulmonary exercise testing, pulmonary gas exchange, respiratory mechanics, mechanisms of dyspnoea in cardio-respiratory diseases. Chair of ERS group 4.01**

### **3. General Disclosure of Conflicts of Interests**

I understand that the intent of this disclosure is not to prevent a Task Force member or chair with a significant financial or other relationship from participating in Task Force, but rather to provide other members with information on which they can make their own judgments. It remains for the other Task Force member and chairs to determine whether my interests or relationships may influence my participation in the project. The ERS does not view the existence of these interests or commitments as necessarily implying bias or decreasing the value of the Task Force member/chair's participation.

☐ **Yes**, I have the following, real or perceived conflicts of interest that relate to this Task Force. I understand that I have to disclose them to the other Task Force members during the first meeting or teleconference.

☒ **No**, I have no, real or perceived, conflicts of interest that relate to this Task Force.

### **4. Tobacco Industry-related Conflicts of Interests**

ERS does not accept faculty who are receiving funding from the tobacco industry.

In the case of **disclosure** of a conflict of interest any time after **1/1/2000** by the person concerned, there is a **5-year ban** from the date of disclosure before that person is allowed to participate actively in an ERS activity.

Where a **conflict of interest is discovered and not disclosed**, there is a **ban for life** from participating in any ERS activity. The same ban applies to any undisclosed other real or perceived, direct or indirect links with the tobacco industry, such as the holding of shares, speaking at or attending meetings organised by the tobacco industry.

Where any person is found to be **maintaining a relationship** with, or **receiving funding from**, the tobacco industry after **1/1/2013** there will be a ban for life from involvement in any ERS activity.

Please select what applies to you:

☒ I declare that I have had **NO** relationship of any kind with the tobacco industry (since 1/1/2000), nor will have a link to the tobacco industry before the event to which I have been invited by the ERS to participate in.

☐ **Yes**, I declare that I have or have had a relationship with the tobacco industry after 1/1/2000 and before 1/1/2013. *NOTE: ERS will have to cancel this invitation and you will be banned from all ERS activity for 5 years.*

☐ **Yes**, I declare that I have or will have a relationship with the tobacco industry after 1/1/2013.

*NOTE: The ERS no longer accepts Faculty who has links with the tobacco industry, the ERS will have to cancel this invitation and you will be banned for life from all ERS activity.*

Signature:

Rosentonia Larkelzane

Date: 26/09/2014

### **1. Task Force's details**

*Full title: Assessment of pulmonary hemodynamics during exercise*

*Chairs' name: Horst Olschewski*

*Number (for approved TF)*

### **2. Personal Information:**

*Title and name and surname:*

*Short statement of my expertise in the topic of the Task Force:*

**Gregory Lewis MD: I have expertise in integrated physiologic testing with gas exchange measurements and hemodynamic measurements during maximum incremental upright exercise. I have led an European-American collaboration to describe pulmonary vascular responses to exercise in normal individuals and in various cardiopulmonary diseases (see Lewis et al, Circulation, 2013).**

### **3. General Disclosure of Conflicts of Interests**

I understand that the intent of this disclosure is not to prevent a Task Force member or chair with a significant financial or other relationship from participating in Task Force, but rather to provide other members with information on which they can make their own judgments. It remains for the other Task Force member and chairs to determine whether my interests or relationships may influence my participation in the project. The ERS does not view the existence of these interests or commitments as necessarily implying bias or decreasing the value of the Task Force member/chair's participation.

☐ **Yes**, I have the following, real or perceived conflicts of interest that relate to this Task Force. I understand that I have to disclose them to the other Task Force members during the first meeting or teleconference.

☒ **No**, I have no, real or perceived, conflicts of interest that relate to this Task Force.

### **4. Tobacco Industry-related Conflicts of Interests**

ERS does not accept faculty who are receiving funding from the tobacco industry.

In the case of **disclosure** of a conflict of interest any time after **1/1/2000** by the person concerned, there is a **5-year ban** from the date of disclosure before that person is allowed to participate actively in an ERS activity.

Where a **conflict of interest is discovered and not disclosed**, there is a **ban for life** from participating in any ERS activity. The same ban applies to any undisclosed other real or perceived, direct or indirect links with the tobacco industry, such as the holding of shares, speaking at or attending meetings organised by the tobacco industry.

Where any person is found to be **maintaining a relationship** with, or **receiving funding from**, the tobacco industry after **1/1/2013** there will be a ban for life from involvement in any ERS activity.

Please select what applies to you:

☒ I declare that I have had **NO** relationship of any kind with the tobacco industry (since 1/1/2000), nor will have a link to the tobacco industry before the event to which I have been invited by the ERS to participate in.

☐ **Yes**, I declare that I have or have had a relationship with the tobacco industry after 1/1/2000 and before 1/1/2013. *NOTE: ERS will have to cancel this invitation and you will be banned from all ERS activity for 5 years.*

☐ **Yes**, I declare that I have or will have a relationship with the tobacco industry after 1/1/2013.

*NOTE: The ERS no longer accepts Faculty who has links with the tobacco industry, the ERS will have to cancel this invitation and you will be banned for life from all ERS activity.*

Signature: Gregory Lewis  
2014

Date: September 28,

### **1. Task Force's details**

*Full title: Assessment of pulmonary exercise hemodynamics*

*Chairs' name: Horst Olschewski,*

*Number (for approved TF) Philippe Hervé*

### **2. Personal Information:**

*Title and name and surname:*

*Short statement of my expertise in the topic of the Task Force:*

**Robert Naeije, Professor Emeritus in Physiology and Medicine at the Free University of Brussels, Consultant at the Pulmonary Hypertension Clinic, Department of Cardiology, Erasme University Hospital Brussels**

**I contributed to the understanding and methodology of exercise stress testing of the pulmonary circulation (Naeije R, Vanderpool R, Dhakal BP, Saggar R, Saggar R, Vachieri JL, Lewis GD. Exercise Induced Pulmonary Hypertension Physiological Basis and Methodological Concerns. Am J Respir Crit Care Med. 2013, 187: 576-83)**

### **3. General Disclosure of Conflicts of Interests**

I understand that the intent of this disclosure is not to prevent a Task Force member or chair with a significant financial or other relationship from participating in Task Force, but rather to provide other members with information on which they can make their own judgments. It remains for the other Task Force member and chairs to determine whether my interests or relationships may influence my participation in the project. The ERS does not view the existence of these interests or commitments as necessarily implying bias or decreasing the value of the Task Force member/chair's participation.

☐ **Yes**, I have the following, real or perceived conflicts of interest that relate to this Task Force. I understand that I have to disclose them to the other Task Force members during the first meeting or teleconference.

☒ **No**, I have no, real or perceived, conflicts of interest that relate to this Task Force.

### **4. Tobacco Industry-related Conflicts of Interests**

ERS does not accept faculty who are receiving funding from the tobacco industry.

In the case of **disclosure** of a conflict of interest any time after **1/1/2000** by the person concerned, there is a **5-year ban** from the date of disclosure before that person is allowed to participate actively in an ERS activity.

Where a **conflict of interest is discovered and not disclosed**, there is a **ban for life** from participating in any ERS activity. The same ban applies to any undisclosed other real or

perceived, direct or indirect links with the tobacco industry, such as the holding of shares, speaking at or attending meetings organised by the tobacco industry.

Where any person is found to be **maintaining a relationship** with, or **receiving funding from**, the tobacco industry after **1/1/2013** there will be a ban for life from involvement in any ERS activity.

Please select what applies to you:

☒ I declare that I have had **NO** relationship of any kind with the tobacco industry (since 1/1/2000), nor will have a link to the tobacco industry before the event to which I have been invited by the ERS to participate in.

☐ **Yes**, I declare that I have or have had a relationship with the tobacco industry after 1/1/2000 and before 1/1/2013. *NOTE: ERS will have to cancel this invitation and you will be banned from all ERS activity for 5 years.*

☐ **Yes**, I declare that I have or will have a relationship with the tobacco industry after 1/1/2013.

*NOTE: The ERS no longer accepts Faculty who has links with the tobacco industry, the ERS will have to cancel this invitation and you will be banned for life from all ERS activity.*

Signature: Robert Naeije

Date: 28/09/2104



## **2. Personal Information:**

*Title and name and surname:*

*Short statement of my expertise in the topic of the Task Force:*

**Non invasive Haemodynamics of the RV**

## **3. General Disclosure of Conflicts of Interests**

I understand that the intent of this disclosure is not to prevent a Task Force member or chair with a significant financial or other relationship from participating in Task Force, but rather to provide other members with information on which they can make their own judgments. It remains for the other Task Force member and chairs to determine whether my interests or relationships may influence my participation in the project. The ERS does not view the existence of these interests or commitments as necessarily implying bias or decreasing the value of the Task Force member/chair's participation.

☐ **Yes**, I have the following, real or perceived conflicts of interest that relate to this Task Force. I understand that I have to disclose them to the other Task Force members during the first meeting or teleconference.

☒ **No**, I have no, real or perceived, conflicts of interest that relate to this Task Force.

## **4. Tobacco Industry-related Conflicts of Interests**

ERS does not accept faculty who are receiving funding from the tobacco industry.

In the case of **disclosure** of a conflict of interest any time after **1/1/2000** by the person concerned, there is a **5-year ban** from the date of disclosure before that person is allowed to participate actively in an ERS activity.

Where a **conflict of interest is discovered and not disclosed**, there is a **ban for life** from participating in any ERS activity. The same ban applies to any undisclosed other real or perceived, direct or indirect links with the tobacco industry, such as the holding of shares, speaking at or attending meetings organised by the tobacco industry.

Where any person is found to be **maintaining a relationship** with, or **receiving funding from**, the tobacco industry after **1/1/2013** there will be a ban for life from involvement in any ERS activity.

Please select what applies to you:

☒ I declare that I have had **NO** relationship of any kind with the tobacco industry (since 1/1/2000), nor will have a link to the tobacco industry before the event to which I have been invited by the ERS to participate in.

☐ **Yes**, I declare that I have or have had a relationship with the tobacco industry after 1/1/2000 and before 1/1/2013. *NOTE: ERS will have to cancel this invitation and you will be banned from all ERS activity for 5 years.*

☐ **Yes**, I declare that I have or will have a relationship with the tobacco industry after 1/1/2013.

*NOTE: The ERS no longer accepts Faculty who has links with the tobacco industry, the ERS will have to cancel this invitation and you will be banned for life from all ERS activity.*

A handwritten signature in blue ink, reading "Andrew J. Keenan". The signature is written in a cursive style with a horizontal line underneath the name.

Signature:

Date: 16/3/17

### **1. Task Force's details**

*Full title: ERS Task Force on Exercise Hemodynamics.*

*Chairs' name: Horst Olschewski*

*Number (for approved TF)*

### **2. Personal Information:**

*Title and name and surname:*

*Short statement of my expertise in the topic of the Task Force:*

**Prof. Dr. Stephan Rosenkranz**

**Expert in the field of pulmonary hypertension, pulmonary hemodynamics, left and right heart failure. Head of PH center at Cologne University. Experience in numerous clinical trials as well as basic research on this topic. Particular interest in exercise hemodynamics in PH and heart failure.**

### **3. General Disclosure of Conflicts of Interests**

I understand that the intent of this disclosure is not to prevent a Task Force member or chair with a significant financial or other relationship from participating in Task Force, but rather to provide other members with information on which they can make their own judgments. It remains for the other Task Force member and chairs to determine whether my interests or relationships may influence my participation in the project. The ERS does not view the existence of these interests or commitments as necessarily implying bias or decreasing the value of the Task Force member/chair's participation.

☐ **Yes**, I have the following, real or perceived conflicts of interest that relate to this Task Force. I understand that I have to disclose them to the other Task Force members during the first meeting or teleconference.

☒ **No**, I have no, real or perceived, conflicts of interest that relate to this Task Force.

### **4. Tobacco Industry-related Conflicts of Interests**

ERS does not accept faculty who are receiving funding from the tobacco industry.

In the case of **disclosure** of a conflict of interest any time after **1/1/2000** by the person concerned, there is a **5-year ban** from the date of disclosure before that person is allowed to participate actively in an ERS activity.

Where a **conflict of interest is discovered and not disclosed**, there is a **ban for life** from participating in any ERS activity. The same ban applies to any undisclosed other real or perceived, direct or indirect links with the tobacco industry, such as the holding of shares, speaking at or attending meetings organised by the tobacco industry.

Where any person is found to be **maintaining a relationship** with, or **receiving funding from**, the tobacco industry after **1/1/2013** there will be a ban for life from involvement in any ERS activity.

Please select what applies to you:

☒ I declare that I have had **NO** relationship of any kind with the tobacco industry (since 1/1/2000), nor will have a link to the tobacco industry before the event to which I have been invited by the ERS to participate in.

☐ **Yes**, I declare that I have or have had a relationship with the tobacco industry after 1/1/2000 and before 1/1/2013. *NOTE: ERS will have to cancel this invitation and you will be banned from all ERS activity for 5 years.*

☐ **Yes**, I declare that I have or will have a relationship with the tobacco industry after 1/1/2013.

*NOTE: The ERS no longer accepts Faculty who has links with the tobacco industry, the ERS will have to cancel this invitation and you will be banned for life from all ERS activity.*

Signature: Stephan Rosenkranz

Date: 30-SEP-2014

### **1. Task Force's details**

*Full title: Assessment of pulmonary exercise hemodynamics*

*Chairs' name: Horst Olschewski and Philippe Hervé*

*Number (for approved TF) 4.3 and 4.1*

### **2. Personal Information:**

*Title and name and surname:*

*Short statement of my expertise in the topic of the Task Force:*

**Rajeev Saggarr, MD**

**Chair Pulmonary Division and Advanced Lung Disease Institute, Associate Professor of Medicine, Banner Good Samaritan Medical Center**

**I have strong interest and experience on exercise pulmonary hemodynamics in the US. In addition, I have performed several studies on patients at risk for PH and also investigated therapeutic aspects in conditions with increased pulmonary pressures during exercise. Finally, our group recently completed the first multi-center exercise pulmonary hemodynamic (using right heart catheterization) trial in the U.S. in PH patients evaluating the effects of a therapeutic agent on pressure-flow curves.**

### **3. General Disclosure of Conflicts of Interests**

I understand that the intent of this disclosure is not to prevent a Task Force member or chair with a significant financial or other relationship from participating in Task Force, but rather to provide other members with information on which they can make their own judgments. It remains for the other Task Force member and chairs to determine whether my interests or relationships may influence my participation in the project. The ERS does not view the existence of these interests or commitments as necessarily implying bias or decreasing the value of the Task Force member/chair's participation.

☐ **Yes**, I have the following, real or perceived conflicts of interest that relate to this Task Force. I understand that I have to disclose them to the other Task Force members during the first meeting or teleconference.

☒ **No**, I have no, real or perceived, conflicts of interest that relate to this Task Force.

### **4. Tobacco Industry-related Conflicts of Interests**

ERS does not accept faculty who are receiving funding from the tobacco industry.

In the case of **disclosure** of a conflict of interest any time after **1/1/2000** by the person concerned, there is a **5-year ban** from the date of disclosure before that person is allowed to participate actively in an ERS activity.



Where a **conflict of interest is discovered and not disclosed**, there is a **ban for life** from participating in any ERS activity. The same ban applies to any undisclosed other real or perceived, direct or indirect links with the tobacco industry, such as the holding of shares, speaking at or attending meetings organised by the tobacco industry.

Where any person is found to be **maintaining a relationship** with, or **receiving funding from**, the tobacco industry after **1/1/2013** there will be a ban for life from involvement in any ERS activity.

Please select what applies to you:

☒ I declare that I have had **NO** relationship of any kind with the tobacco industry (since 1/1/2000), nor will have a link to the tobacco industry before the event to which I have been invited by the ERS to participate in.

☐ **Yes**, I declare that I have or have had a relationship with the tobacco industry after 1/1/2000 and before 1/1/2013. *NOTE: ERS will have to cancel this invitation and you will be banned from all ERS activity for 5 years.*

☐ **Yes**, I declare that I have or will have a relationship with the tobacco industry after 1/1/2013.

*NOTE: The ERS no longer accepts Faculty who has links with the tobacco industry, the ERS will have to cancel this invitation and you will be banned for life from all ERS activity.*

Signature:

A handwritten signature in black ink, appearing to be 'A. M.', written over a horizontal line.

Date: September 26, 2014

### **1. Task Force's details**

*Full title: Assessment of pulmonary exercise hemodynamics*

*Chairs' name: Horst Olschewski,*

*Number (for approved TF) Philippe Hervé*

### **2. Personal Information:**

*Title and name and surname:*

*Short statement of my expertise in the topic of the Task Force:*

**Dr. Silvia Ulrich, is a Private Docent of Pulmonology and Head of the Pulmonary Hypertension Unit at the University Hospital of Zurich, Switzerland.**

**I see many patients daily with PH and perform exercise right heart catheterisation since many years. I have currently three ongoing studies on assessing exercise pulmonary hemodynamics and have done several studies as principal investigator in the field of PH, sleep and oxygen therapy. My special focus thus are the consequences of sleep and exercise on PH and the effect of oxygen therapy.**

### **3. General Disclosure of Conflicts of Interests**

I understand that the intent of this disclosure is not to prevent a Task Force member or chair with a significant financial or other relationship from participating in Task Force, but rather to provide other members with information on which they can make their own judgments. It remains for the other Task Force member and chairs to determine whether my interests or relationships may influence my participation in the project. The ERS does not view the existence of these interests or commitments as necessarily implying bias or decreasing the value of the Task Force member/chair's participation.

☐ **Yes**, I have the following, real or perceived conflicts of interest that relate to this Task Force. I understand that I have to disclose them to the other Task Force members during the first meeting or teleconference.

☒ **No**, I have no, real or perceived, conflicts of interest that relate to this Task Force.

### **4. Tobacco Industry-related Conflicts of Interests**

ERS does not accept faculty who are receiving funding from the tobacco industry.

In the case of **disclosure** of a conflict of interest any time after **1/1/2000** by the person concerned, there is a **5-year ban** from the date of disclosure before that person is allowed to participate actively in an ERS activity.

Where a **conflict of interest is discovered and not disclosed**, there is a **ban for life** from participating in any ERS activity. The same ban applies to any undisclosed other real or perceived, direct or indirect links with the tobacco industry, such as the holding of shares, speaking at or attending meetings organised by the tobacco industry.

Where any person is found to be **maintaining a relationship** with, or **receiving funding from**, the tobacco industry after **1/1/2013** there will be a ban for life from involvement in any ERS activity.

Please select what applies to you:

☒ I declare that I have had **NO** relationship of any kind with the tobacco industry (since 1/1/2000), nor will have a link to the tobacco industry before the event to which I have been invited by the ERS to participate in.

☐ **Yes**, I declare that I have or have had a relationship with the tobacco industry after 1/1/2000 and before 1/1/2013. *NOTE: ERS will have to cancel this invitation and you will be banned from all ERS activity for 5 years.*

☐ **Yes**, I declare that I have or will have a relationship with the tobacco industry after 1/1/2013.

*NOTE: The ERS no longer accepts Faculty who has links with the tobacco industry, the ERS will have to cancel this invitation and you will be banned for life from all ERS activity.*

Signature: PD Dr. Silvia Ulrich



Date: <29/09/2104

### **1. Task Force's details**

*Full title: Assessment of pulmonary exercise hemodynamics*

*Chairs' name: Horst Olschewski,*

*Number (for approved TF) Philippe Hervé*

### **2. Personal Information:**

*Title and name and surname:*

*Short statement of my expertise in the topic of the Task Force:*

**Carmine Dario Vizza, associate Professore in Cardiology, University of Rome La Sapienza**

**I have taken part in a wide range of investigations assessing exercise pulmonary hemodynamics. My special focus is on cardiac and respiratory causes of PH. In particular on the role of vasoactive peptides in the regulation of blood flow and pulmonary vascular resistances.**

### **3. General Disclosure of Conflicts of Interests**

I understand that the intent of this disclosure is not to prevent a Task Force member or chair with a significant financial or other relationship from participating in Task Force, but rather to provide other members with information on which they can make their own judgments. It remains for the other Task Force member and chairs to determine whether my interests or relationships may influence my participation in the project. The ERS does not view the existence of these interests or commitments as necessarily implying bias or decreasing the value of the Task Force member/chair's participation.

☐ **Yes**, I have the following, real or perceived conflicts of interest that relate to this Task Force. I understand that I have to disclose them to the other Task Force members during the first meeting or teleconference.

☒ **No**, I have no, real or perceived, conflicts of interest that relate to this Task Force.

### **4. Tobacco Industry-related Conflicts of Interests**

ERS does not accept faculty who are receiving funding from the tobacco industry.

In the case of **disclosure** of a conflict of interest any time after **1/1/2000** by the person concerned, there is a **5-year ban** from the date of disclosure before that person is allowed to participate actively in an ERS activity.

Where a **conflict of interest is discovered and not disclosed**, there is a **ban for life** from participating in any ERS activity. The same ban applies to any undisclosed other real or perceived, direct or indirect links with the tobacco industry, such as the holding of shares, speaking at or attending meetings organised by the tobacco industry.

Where any person is found to be **maintaining a relationship** with, or **receiving funding from**, the tobacco industry after **1/1/2013** there will be a ban for life from involvement in any ERS activity.

Please select what applies to you:

☒ I declare that I have had **NO** relationship of any kind with the tobacco industry (since 1/1/2000), nor will have a link to the tobacco industry before the event to which I have been invited by the ERS to participate in.

☐ **Yes**, I declare that I have or have had a relationship with the tobacco industry after 1/1/2000 and before 1/1/2013. *NOTE: ERS will have to cancel this invitation and you will be banned from all ERS activity for 5 years.*

☐ **Yes**, I declare that I have or will have a relationship with the tobacco industry after 1/1/2013.

*NOTE: The ERS no longer accepts Faculty who has links with the tobacco industry, the ERS will have to cancel this invitation and you will be banned for life from all ERS activity.*

Signature: Carmine Dario Vizza

Date: 28/09/2104



## ERS Conflict of Interest form for Task Force Chairs and members

Please complete and tick ☒ the following statements as appropriate.

### **1. Task Force's details**

*Full title: Assessment of pulmonary exercise hemodynamics*

*Chairs' name: H. Olschewski, P. Herve*

*Number (for approved TF) TF-2014-25*

### **2. Personal Information:**

*Title and name and surname:*

*Short statement of my expertise in the topic of the Task Force:*

**Anton Vonk Noordegraaf**

**My specific expertise is right ventricular function in relation to the pulmonary vascular load during exercise conditions**

### **3. General Disclosure of Conflicts of Interests**

I understand that the intent of this disclosure is not to prevent a Task Force member or chair with a significant financial or other relationship from participating in Task Force, but rather to provide other members with information on which they can make their own judgments. It remains for the other Task Force member and chairs to determine whether my interests or relationships may influence my participation in the project. The ERS does not view the existence of these interests or commitments as necessarily implying bias or decreasing the value of the Task Force member/chair's participation.

☐ **Yes**, I have the following, real or perceived conflicts of interest that relate to this Task Force. I understand that I have to disclose them to the other Task Force members during the first meeting or teleconference.

☒ **No**, I have no, real or perceived, conflicts of interest that relate to this Task Force.

### **4. Tobacco Industry-related Conflicts of Interests**

ERS does not accept faculty who are receiving funding from the tobacco industry.

In the case of **disclosure** of a conflict of interest any time after **1/1/2000** by the person concerned, there is a **5-year ban** from the date of disclosure before that person is allowed to participate actively in an ERS activity.

Where a **conflict of interest is discovered and not disclosed**, there is a **ban for life** from participating in any ERS activity. The same ban applies to any undisclosed other real or perceived, direct or indirect links with the tobacco industry, such as the holding of shares, speaking at or attending meetings organised by the tobacco industry.

Where any person is found to be **maintaining a relationship** with, or **receiving funding from**, the tobacco industry after **1/1/2013** there will be a ban for life from involvement in any ERS activity.

Please select what applies to you:

☒ I declare that I have had **NO** relationship of any kind with the tobacco industry (since 1/1/2000), nor will have a link to the tobacco industry before the event to which I have been invited by the ERS to participate in.

☐ **Yes**, I declare that I have or have had a relationship with the tobacco industry after 1/1/2000 and before 1/1/2013. *NOTE: ERS will have to cancel this invitation and you will be banned from all ERS activity for 5 years.*

☐ **Yes**, I declare that I have or will have a relationship with the tobacco industry after 1/1/2013.

*NOTE: The ERS no longer accepts Faculty who has links with the tobacco industry, the ERS will have to cancel this invitation and you will be banned for life from all ERS activity.*

Signature: Anton Vonk noordegraaf

Date: 15-5-2017

**Please return this form to the ERS Headquarters, duly completed and signed by fax to +41 21 213 01 00 or by email to [valerie.rebeaud@ersnet.org](mailto:valerie.rebeaud@ersnet.org)**

### 1. Task Force's details

Full title: Univ Prof Dr med

Chairs' name: OLSCHIEWSKI, HORST ; HERVE, PHILIPPE

Number (for approved TF)

### 2. Personal Information:

Title and name and surname: Horst Olschewski

Short statement of my expertise in the topic of the Task Force:

Exercise test with CPET + RHC in controls, borderline PH and manifest PH.

### 3. General Disclosure of Conflicts of Interests

I understand that the intent of this disclosure is not to prevent a Task Force member or chair with a significant financial or other relationship from participating in Task Force, but rather to provide other members with information on which they can make their own judgments. It remains for the other Task Force member and chairs to determine whether my interests or relationships may influence my participation in the project. The ERS does not view the existence of these interests or commitments as necessarily implying bias or decreasing the value of the Task Force member/chair's participation.

☐ **Yes**, I have the following, real or perceived conflicts of interest that relate to this Task Force. I understand that I have to disclose them to the other Task Force members during the first meeting or teleconference.

☒ **No**, I have no, real or perceived, conflicts of interest that relate to this Task Force.

### 4. Tobacco Industry-related Conflicts of Interests

ERS does not accept faculty who are receiving funding from the tobacco industry.

In the case of **disclosure** of a conflict of interest any time after **1/1/2000** by the person concerned, there is a **5-year ban** from the date of disclosure before that person is allowed to participate actively in an ERS activity.

Where a **conflict of interest is discovered and not disclosed**, there is a **ban for life** from participating in any ERS activity. The same ban applies to any undisclosed other real or perceived, direct or indirect links with the tobacco industry, such as the holding of shares, speaking at or attending meetings organised by the tobacco industry.

Where any person is found to be **maintaining a relationship** with, or **receiving funding from**, the tobacco industry after **1/1/2013** there will be a ban for life from involvement in any ERS activity.

Please select what applies to you:

☒ I declare that I have had **NO** relationship of any kind with the tobacco industry (since 1/1/2000), nor will have a link to the tobacco industry before the event to which I have been invited by the ERS to participate in.

☐ **Yes**, I declare that I have or have had a relationship with the tobacco industry after 1/1/2000 and before 1/1/2013. *NOTE: ERS will have to cancel this invitation and you will be banned from all ERS activity for 5 years.*

☐ **Yes**, I declare that I have or will have a relationship with the tobacco industry after 1/1/2013.

*NOTE: The ERS no longer accepts Faculty who has links with the tobacco industry, the ERS will have to cancel this invitation and you will be banned for life from all ERS activity.*

Signature:



Date:

29 Sep 2014
